# Supplementary material
Source: publisher figshare collection journal article supplement (https://tandf.figshare.com/ndownloader/files/21654324)
Supplement: Supplementary file 1 [file 21654324]

# Supporting Information

## A new coumarin derivative from the stems of the endangered plant *Ulmus elongate*

Qi Zhou<sup>a,1</sup>, Shou-Yuan Wu<sup>b,1</sup>, Chun-Xiao Jiang<sup>a</sup>, Ying-Peng Tong<sup>a</sup>, Ting Zhao<sup>c</sup>, Bin Zhang<sup>c</sup>,  
Xu-Hua Nong<sup>c</sup>, Ze-Xin Jin<sup>a,\*</sup>, Jin-Feng Hu<sup>a,d,\*</sup>

<sup>a</sup>Institute of Natural Medicine and Health Products, Zhejiang Provincial Key Laboratory of Plant Evolutionary Ecology and Conservation, School of Advanced Study, Taizhou University, Taizhou, P.R. China; <sup>b</sup>School of Chemistry and Chemical Engineering, Lingnan Normal University, Zhanjiang, P.R. China; <sup>c</sup>Key Laboratory of Tropical Medicinal Plant Chemistry of Ministry of Education, Hainan Normal University, Haikou, P.R. China; <sup>d</sup>School of Pharmacy, Fudan University, Shanghai, P.R. China

---

\*Correspondence author.

E-mails addresses: jfhu@fudan.edu.cn (Jin-Feng Hu); jzx@tzc.edu.cn (Ze-xin Jin).

<sup>1</sup>Qi Zhou and Shou-Yuan Wu contributed equally to this work.

## **ABSTRACT**

A preliminary phytochemical investigation of the stems of the endangered plant *Ulmus elongata* led to the isolation of a new coumarin derivative (named ulmuselactone A, **1**) and eight known compounds (**2-9**). The new structure was elucidated by detailed analysis of comprehensive spectroscopic methods, and its absolute configuration was established by comparing experimental and calculated electronic circular dichroism (ECD) spectra. The isolated compounds were evaluated for their antibacterial activities.

## **KEYWORDS**

*Ulmus elongata*; Ulmaceae; coumarin derivative; ulmuselactone A; antibacterial activities

## Contents of Supporting Information

**Figure S1. Selected 2D NMR correlations for ulmuselactone A (1).**

**Figure S2.  $^1\text{H}$  NMR spectrum of ulmuselactone A (1) in  $\text{DMSO-}d_6$ .**

**Figure S3.  $^{13}\text{C}$  NMR spectrum of ulmuselactone A (1) in  $\text{DMSO-}d_6$ .**

**Figure S4.  $^1\text{H}$ - $^1\text{H}$  COSY spectrum of ulmuselactone A (1) in  $\text{DMSO-}d_6$ .**

**Figure S5. HSQC spectrum of ulmuselactone A (1) in  $\text{DMSO-}d_6$ .**

**Figure S6. HMBC spectrum of ulmuselactone A (1) in  $\text{DMSO-}d_6$ .**

**Figure S7. NOESY spectrum of ulmuselactone A (1) in  $\text{DMSO-}d_6$ .**

**Figure S8. Experimental and calculated ECD spectra of ulmuselactone A (1).**

**Figure S9. HRESI (+) MS spectrum of ulmuselactone A (1).**

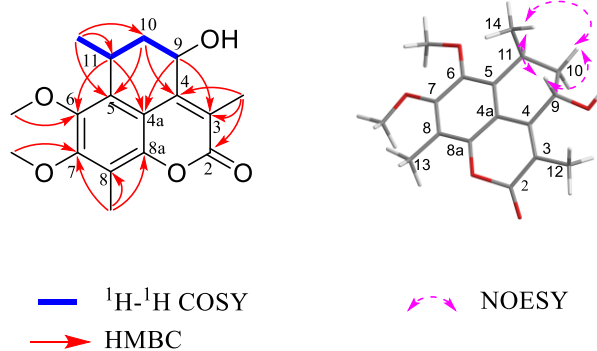

**Figure S1. Selected 2D NMR correlations for ulmuselactone A (1).**

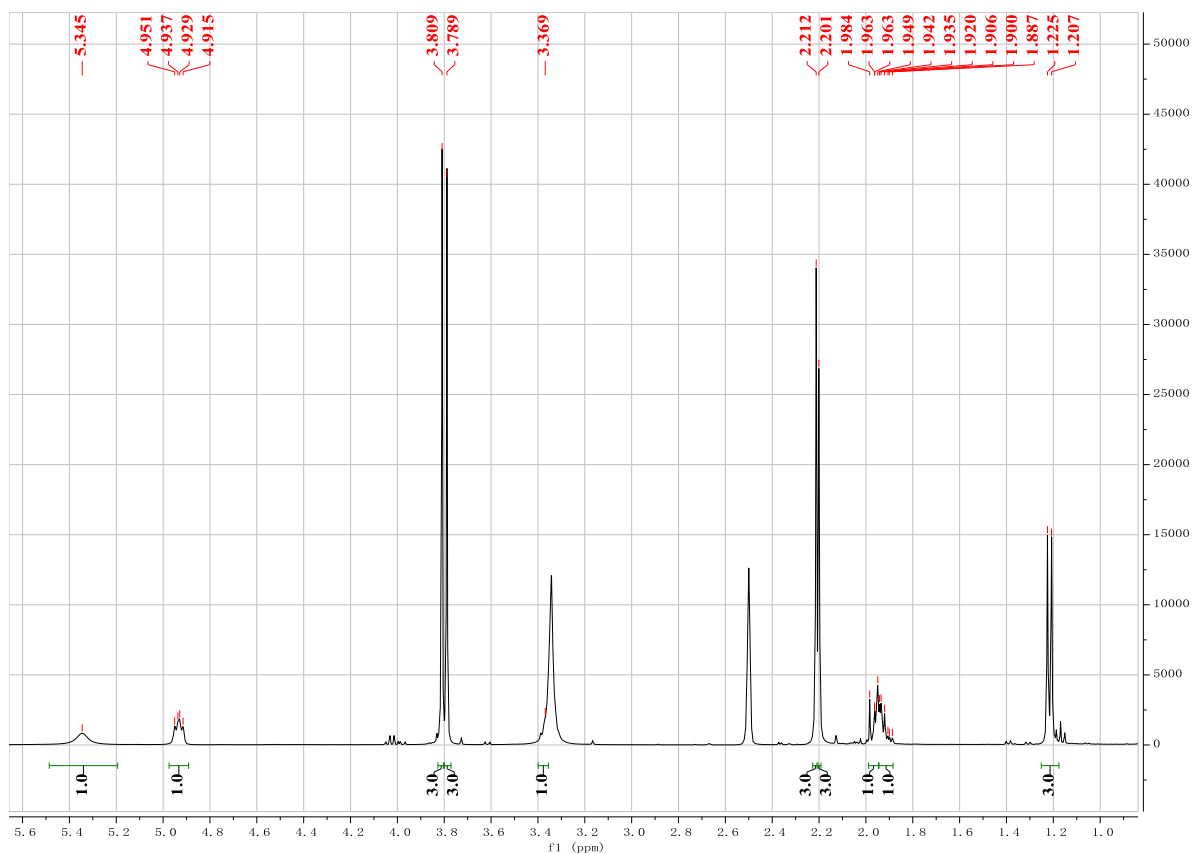

**Figure S2.  $^1\text{H}$  NMR spectrum of ulmuselactone A (1) in  $\text{DMSO}-d_6$ .**

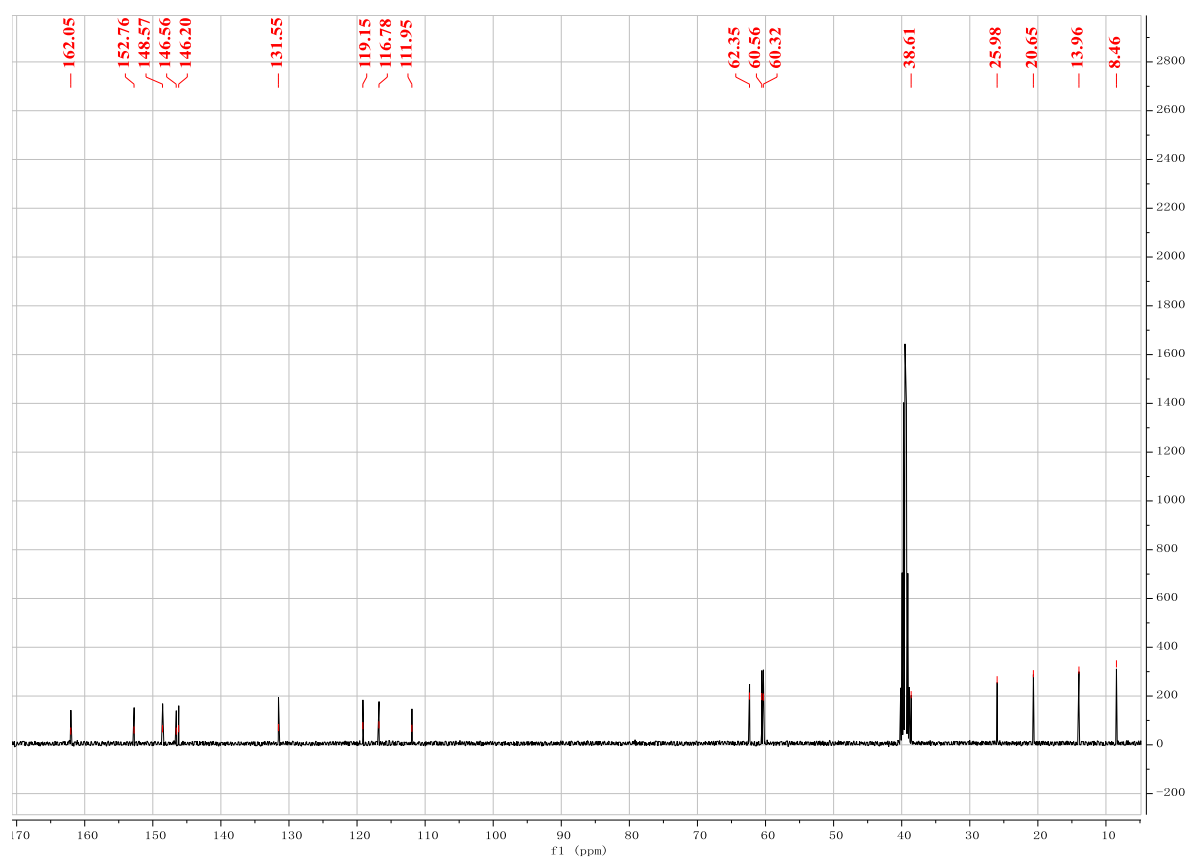

**Figure S3.**  $^{13}\text{C}$  NMR spectrum of ulmuselactone A (1) in  $\text{DMSO}-d_6$ .

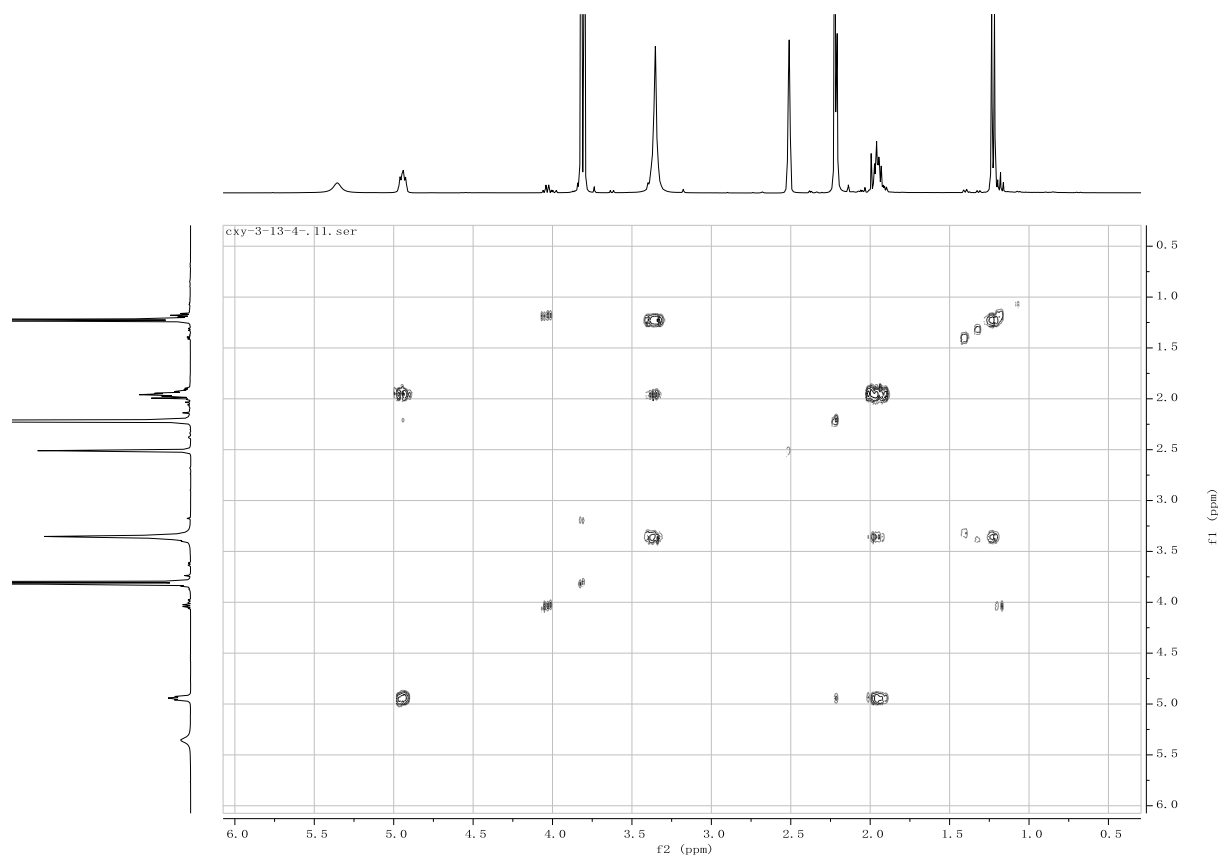

**Figure S4.**  $^1\text{H}$ - $^1\text{H}$  COSY spectrum of ulmuselactone A (1) in  $\text{DMSO}-d_6$ .

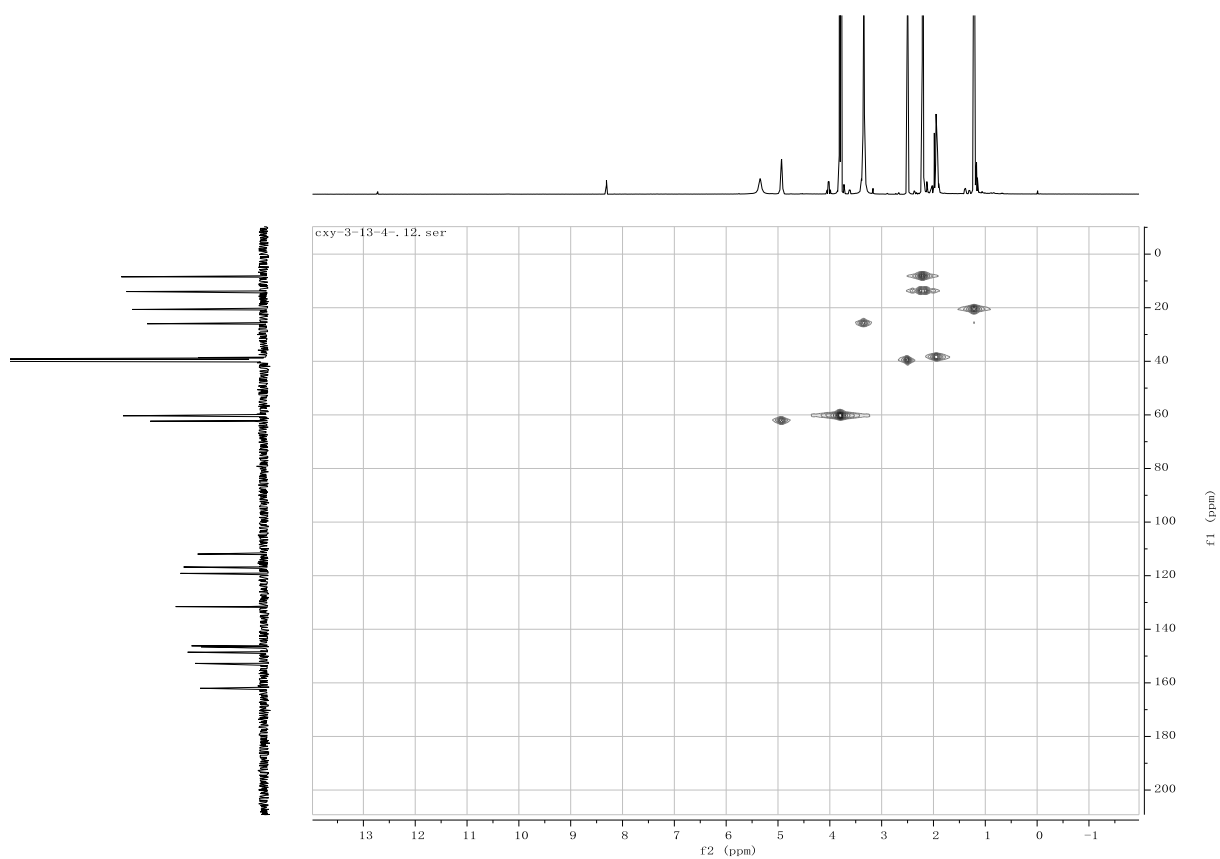

**Figure S5. HSQC spectrum of ulmuselactone A (1) in DMSO- $d_6$ .**

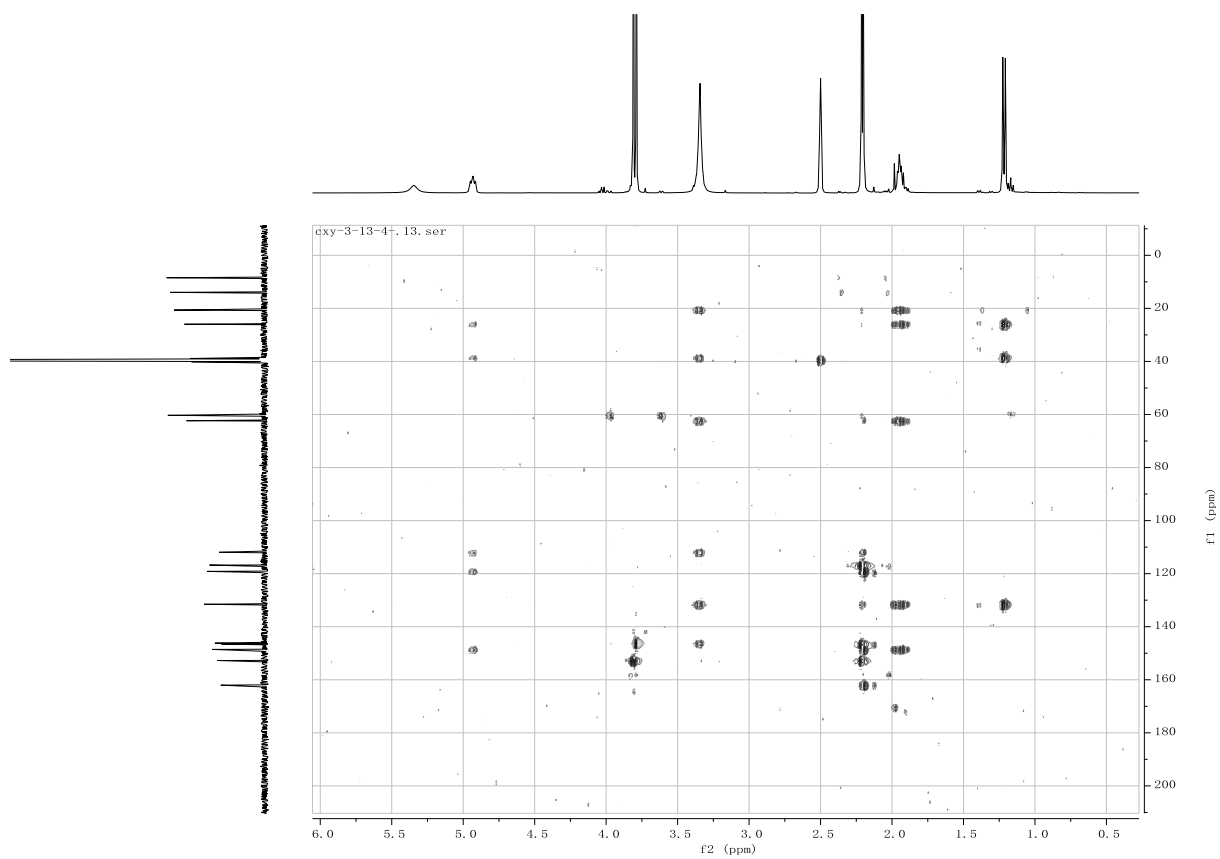

**Figure S6. HMBC spectrum of ulmuselactone A (1) in DMSO- $d_6$ .**

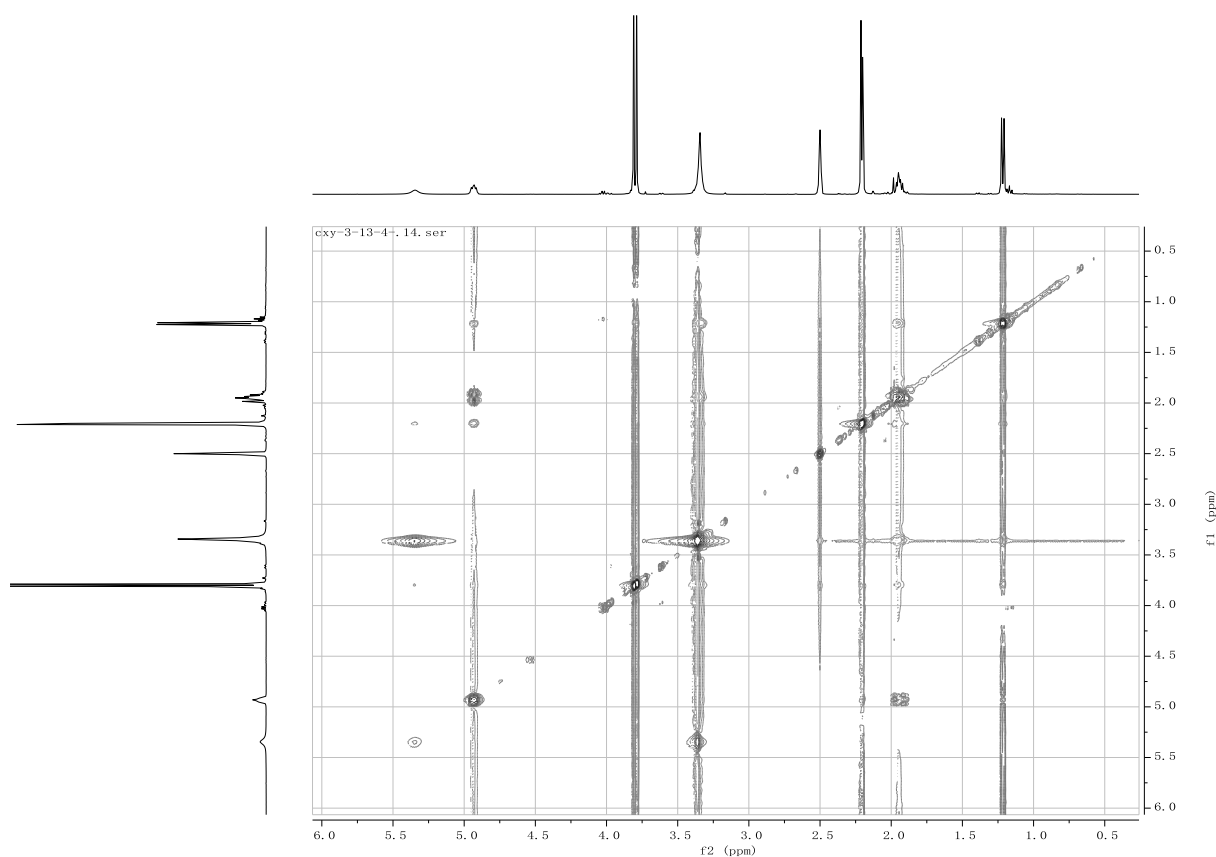

**Figure S7.** NOESY spectrum of ulmuselactone A (1) in DMSO- $d_6$ .

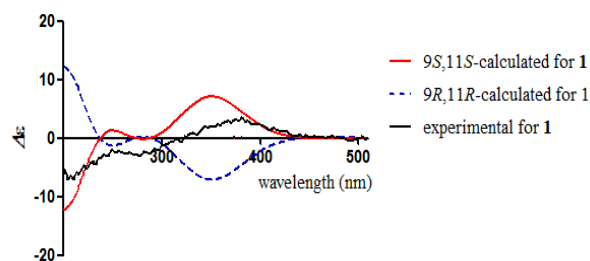

**Figure.S8** The comparison of the calculation ECD spectrum for (9S,11S)-1 and (9R, 11R)-1 with the experimentation ECD spectrum.

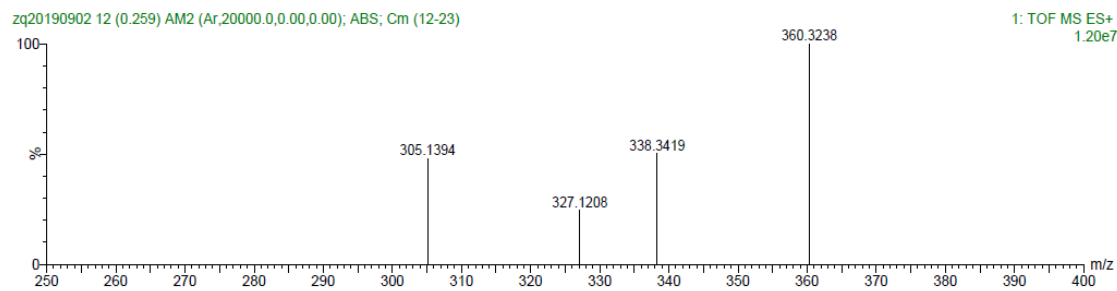

**Figure S9.** HRESI (+) MS spectrum of ulmuselactone A (1).
